# Supplementary material for: Efficiently enhancing the photocatalytic activity of faceted TiO2nanocrystals by selectively loading α-Fe2O3and Pt co-catalysts
Source: Royal Society of Chemistry journal article supplement (doi:10.1039/c6ra04552a), 2016-01-01
Supplement: c6ra04552a1.pdf [file c6ra04552a1.pdf]

Electronic Supplementary Material (ESI) for Journal of Materials Chemistry A.

### Efficiently Enhancing Photocatalytic activity of Faceted TiO<sub>2</sub> Nanocrystals by Selectively Loading $\alpha$ -Fe<sub>2</sub>O<sub>3</sub> and Pt dual co-catalysts

Chang Liu, Ruifeng Tong, Zhenkai Xu, Qin Kuang,\* Zhaoxiong Xie, and Lansun Zheng

State Key Laboratory for Physical Chemistry of Solid Surfaces & Department of Chemistry,  
College of Chemistry and Chemical Engineering, Xiamen University, Xiamen, China

To whom correspondence should be addressed. Email: [qkuang@xmu.edu.cn](mailto:qkuang@xmu.edu.cn)

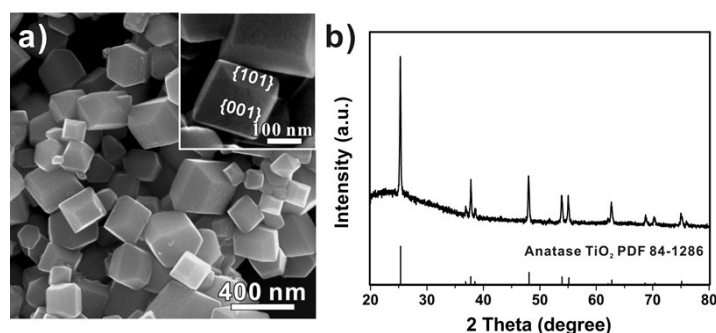

**Fig. S1** (a) SEM image and (b) XRD pattern of the naked TiO<sub>2</sub> NCs.

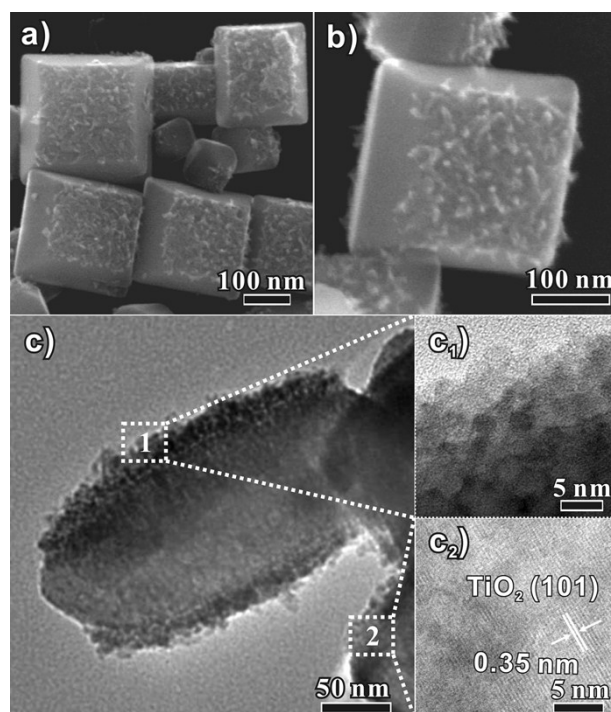

**Fig. S2** (a,b) SEM and (c) TEM images of FeO<sub>x</sub>(OH)<sub>3-2x</sub>-TiO<sub>2</sub> obtained after the photo-activated oxidation step. Insets in (c) are high resolution TEM images recorded from the zones marked with “1” and “2”.

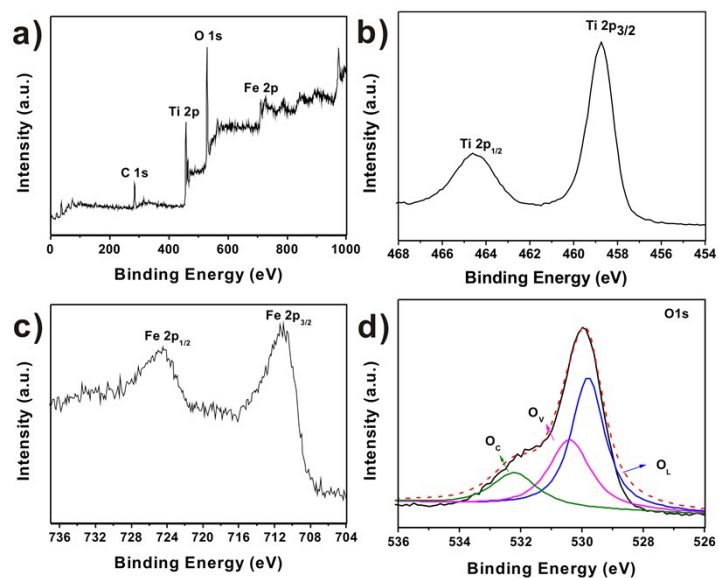

**Fig. S3** XPS spectra of  $\text{FeO}_x(\text{OH})_{3-2x}\text{-TiO}_2$  (a) and high resolution XPS spectra of (b) Ti 2p, (c) Fe 2p and (d) O 1s from  $\text{FeO}_x(\text{OH})_{3-2x}\text{-TiO}_2$ .

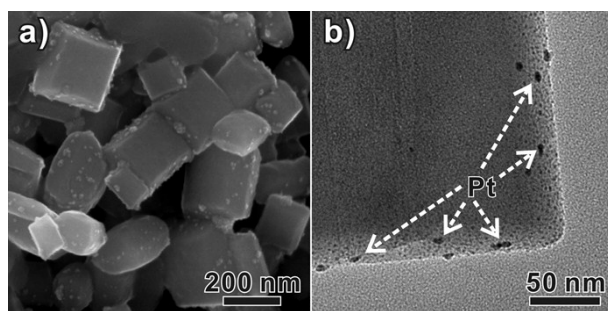

**Fig. S4** (a) SEM and (b) TEM images of  $\text{TiO}_2\text{-Pt}$  NCs that were synthesized by a photoreduction deposition process using  $\text{K}_2\text{PtCl}_6$  as the precursor.

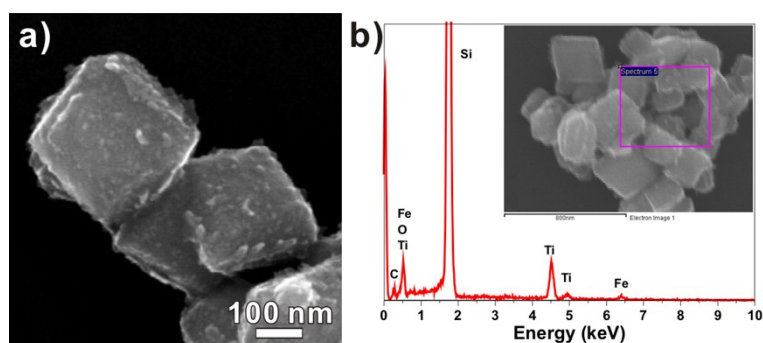

**Fig. S5** (a) SEM images and (b) EDX analysis of  $\text{n-Fe}_2\text{O}_3\text{-TiO}_2$  NCs that were synthesized by a traditional impregnation-calcination method.

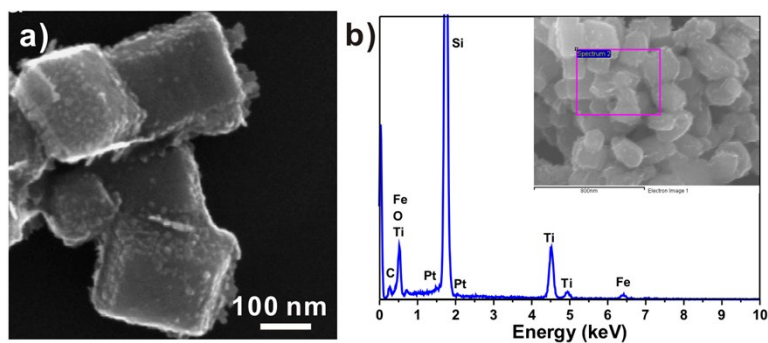

**Fig. S6** (a) SEM image and (b) EDX analysis of n-Fe<sub>2</sub>O<sub>3</sub>-TiO<sub>2</sub>-Pt NCs.

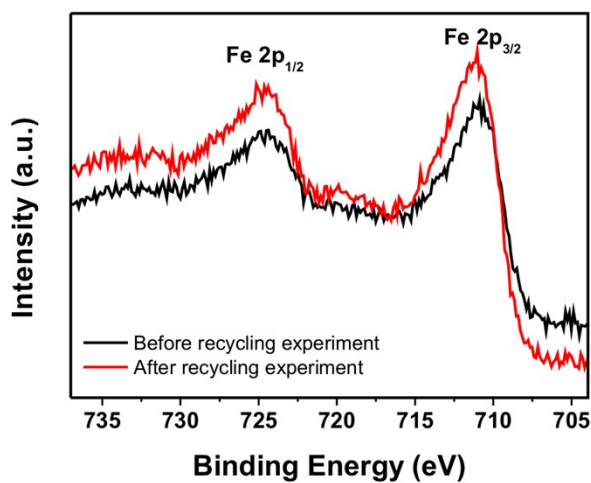

**Fig. S7** High resolution XPS spectra of Fe 2p from Fe<sub>2</sub>O<sub>3</sub>-TiO<sub>2</sub>-Pt before and after photocatalytic recycling H<sub>2</sub> production.

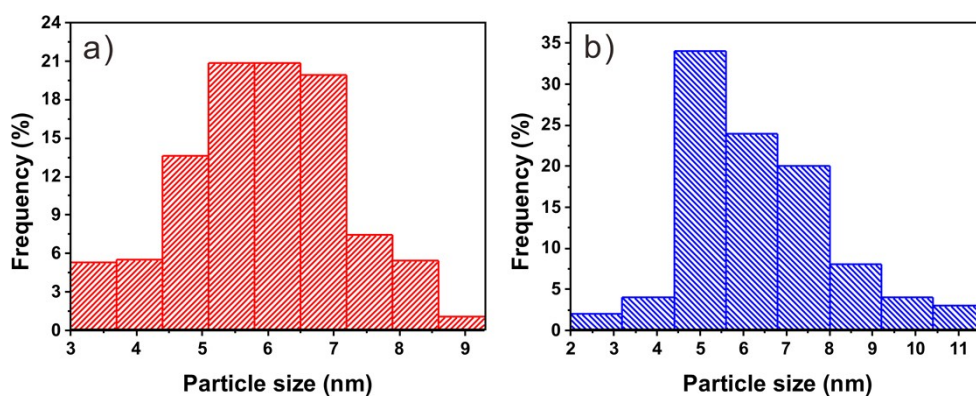

**Fig. S8** The size distributions of (a) Fe<sub>2</sub>O<sub>3</sub> nanoparticles selectively deposited on the surface of TiO<sub>2</sub> NCs and (b) Fe<sub>2</sub>O<sub>3</sub> nanoparticles randomly deposited on the surface of TiO<sub>2</sub> NCs.
